# Supplementary material for: Vertebral body height changes in acute symptomatic osteoporotic vertebral compression fractures treated with vertebral cement augmentation. Which factors affect vertebral body height?
Source: Research Square preprint supplement (doi:10.21203/rs.3.rs-430234/v1), 2021-04-21
Supplement: Supplementary file 1 [file 51942ca40fdaa11ba6fb09b9.docx]

| **Table 3.** Factors related to the restoration of the vertebral body height at different timepoints. | | | | |
| --- | --- | --- | --- | --- |
|  | **Increase height** | **Reduce height** | **Questionable** | **Not associated** |
| **Pre-cementation** | Collapse grade III |  |  | Demographic factor (age, gender, BMI, T-Score)  Vertebral segment treated  Type of fracture  IVVC  Vertebral fracture age |
| **Post-cementation** | Collapse grade III  IVVC |  | Thoracolumbar zone  Cement injected | Demographic factor (age, gender, BMI, T-Score)  Type of fracture  IVVC  Vertebral fracture age  Vertebral augmentation technique |
| **First medical check-up** | Collapse grade III  StabiliT system | Thoracolumbar zone |  | Demographic factor (age, gender, BMI, T-Score)  Type of fracture  IVVC  Vertebral fracture age  Cement injected |
| **Last medical check-up** | StabiliT system |  |  | Demographic factor (age, gender, BMI, T-Score)  Vertebral segment treated  Type of fracture  Severity of fracture  IVVC  Vertebral fracture age  Cement injected |
