# Supplementary material for: Vertebral body height changes in acute symptomatic osteoporotic vertebral compression fractures treated with vertebral cement augmentation. Which factors affect vertebral body height?
Source: Research Square preprint supplement (doi:10.21203/rs.3.rs-430234/v1), 2021-04-21
Supplement: Supplementary file 2 [file 7a374e2a4e326259cc7f8be2.docx]

| **Table 2.** Multiple linear regression for the estimation of the overall vertebral body height at each timepoint with respect to the pre-surgical timepoint. | | | | | |
| --- | --- | --- | --- | --- | --- |
|  | **Coefficient** | **SD** | **t** | **P value** | **95% IC** |
| **Pre-cementation model** | | | | | |
| **Vertebral segment treated** | | | | | |
| **Thoracic (T1-T10)** | *Ref.* |  |  |  |  |
| **Thoracolumbar (T11-L2)** | -0.03 | 0.05 | -0.64 | 0.524 | -0.14 to 0.72 |
| **Lumbar (L3-L5)** | 0.03 | 0.06 | 0.48 | 0.633 | -0.08 to 0.14 |
| **Type of fracture** | | | | | |
| **Wedge** | *Ref.* |  |  |  |  |
| **Biconcave** | -0.02 | 0.051 | -0.50 | 0.617 | -0.13 to 0.08 |
| **Severity of fracture** | | | | | |
| **Grade I** | *Ref.* |  |  |  |  |
| **Grade II** | -0.023 | 0.057 | -0.41 | 0.686 | -0.13 to 0.09 |
| **Grade III** | 0.155 | 0.05 | 2.83 | **0.006** | 0.045 to 0.26 |
| **IVVC** | | | | | |
| **No** | *Ref.* |  |  |  |  |
| **Yes** | 0.06 | 0.05 | 1.16 | 0.250 | -0.05 to 0.18 |
| **Vertebral fracture age** | | | | | |
| **< 6 weeks** | *Ref.* |  |  |  |  |
| **> 6 weeks** | -0.04 | 0.05 | -0.78 | 0.438 | -0.13 to 0.06 |
| **Constant** | 0.05 | 0.07 | 0.73 | 0.465 | -0.09 to 0.20 |
| **Post-cementation model** | | | | | |
| **Vertebral segment treated** | | | | | |
| **Thoracic (T1-T10)** | *Ref.* |  |  |  |  |
| **Thoracolumbar (T11-L2)** | -0.13 | 0.07 | -1.82 | 0.072 | -0.27 to 0.01 |
| **Lumbar (L3-L5)** | 0.006 | 0.07 | 0.08 | 0.939 | -0.14 to 0.16 |
| **Type of fracture** | | | | | |
| **Wedge** | *Ref.* |  |  |  |  |
| **Biconcave** | -0.03 | 0.07 | -0.47 | 0.641 | -0.17 to 0.11 |
| **Severity of fracture** | | | | | |
| **Grade I** | *Ref.* |  |  |  |  |
| **Grade II** | 0.007 | 0.07 | 0.1 | 0.921 | -0.14 to 0.16 |
| **Grade III** | 0.18 | 0.07 | 2.4 | **0.018** | 0.03 to 0.32 |
| **IVVC** | | | | | |
| **No** | *Ref.* |  |  |  |  |
| **Yes** | 0.19 | 0.07 | 2.4 | **0.018** | 0.03 to 0.34 |
| **Vertebral fracture age** | | | | | |
| **< 6 weeks** | *Ref.* |  |  |  |  |
| **> 6 weeks** | 0.03 | 0.06 | 0.46 | 0.647 | -0.095 to 0.15 |
| **Vertebral augmentation technique** | | | | | |
| **Vertebroplasty** | *Ref.* |  |  |  |  |
| **StabiliT system** | 0.13 | 0.08 | 1.66 | 0.1 | -0.02 to 0.29 |
| **Cement injected** | 0.05 | 0.03 | 1.69 | 0.095 | -0.01 to 0.1 |
| **Constant** | -0.03 | 0.12 | -0.22 | 0.826 | -0.26 to 0.21 |
| **First medical check-up model** | | | | | |
| **Vertebral segment treated** | | | | | |
| **Thoracic (T1-T10)** | *Ref.* |  |  |  |  |
| **Thoracolumbar (T11-L2)** | -0.14 | 0.06 | -2.44 | **0.017** | -0.26 to -0.03 |
| **Lumbar (L3-L5)** | -0.05 | 0.06 | -0.74 | 0.464 | -0.17 to 0.08 |
| **Type of fracture** | | | | | |
| **Wedge** | *Ref.* |  |  |  |  |
| **Biconcave** | -0.05 | 0.06 | -0.93 | 0.354 | -0.16 to 0.06 |
| **Severity of fracture** | | | | | |
| **Grade I** | *Ref.* |  |  |  |  |
| **Grade II** | -0.05 | 0.06 | -0.88 | 0.379 | -0.17 to 0.07 |
| **Grade III** | 0.15 | 0.06 | 2.57 | **0.012** | 0.03 to 0.27 |
| **IVVC** | | | | | |
| **No** | *Ref.* |  |  |  |  |
| **Yes** | 0.03 | 0.06 | 0.53 | 0.595 | -0.09 to 0.16 |
| **Vertebral fracture age** | | | | | |
| **< 6 weeks** | *Ref.* |  |  |  |  |
| **> 6 weeks** | -0.04 | 0.05 | -0.68 | 0.496 | -0.13 to 0.06 |
| **Vertebral augmentation technique** | | | | | |
| **Vertebroplasty** | *Ref.* |  |  |  |  |
| **StabiliT system** | 0.22 | 0.06 | 3.46 | **0.001** | 0.09 to 0.35 |
| **Cement injected** | 0.0007 | 0.02 | 0.03 | 0.972 | -0.04 to 0.04 |
| **Constant** | 0.12 | 0.09 | 1.23 | 0.221 | -0.07 to 0.31 |
| **First medical check-up model** | | | | | |
| **Vertebral segment treated** | | | | | |
| **Thoracic (T1-T10)** | *Ref.* |  |  |  |  |
| **Thoracolumbar (T11-L2)** | -0.08 | 0.06 | -1.36 | 0.176 | -0.21 to 0.04 |
| **Lumbar (L3-L5)** | -0.06 | 0.07 | -0.92 | 0.358 | -0.19 to 0.07 |
| **Type of fracture** | | | | | |
| **Wedge** | *Ref.* |  |  |  |  |
| **Biconcave** | -0.06 | 0.06 | -0.97 | 0.334 | -0.18 to 0.07 |
| **Severity of fracture** | | | | | |
| **Grade I** | *Ref.* |  |  |  |  |
| **Grade II** | -0.08 | 0.07 | -1.24 | 0.219 | -0.21 to 0.05 |
| **Grade III** | 0.11 | 0.06 | 1.65 | 0.102 | -0.02 to 0.23 |
| **IVVC** | | | | | |
| **No** | *Ref.* |  |  |  |  |
| **Yes** | 0.03 | 0.07 | 0.42 | 0.675 | -0.11 to 0.16 |
| **Vertebral fracture age** | | | | | |
| **< 6 weeks** | *Ref.* |  |  |  |  |
| **> 6 weeks** | 0.06 | 0.05 | 1.08 | 0.283 | -0.05 to 0.17 |
| **Vertebral augmentation technique** | | | | | |
| **Vertebroplasty** | *Ref.* |  |  |  |  |
| **StabiliT system** | 0.21 | 0.07 | 3.04 | **0.003** | 0.07 to 0.36 |
| **Cement injected** | -0.01 | 0.02 | -0.44 | 0.66 | -0.06 to 0.04 |
| **Constant** | 0.03 | 0.11 | 0.35 | 0.726 | -0.17 to 0.24 |
| SD: Standard deviation  IVVC: Intervertebral vacuum cleft  95% IC: 95% confidence interval  **Grade I:** <25%; **Grade II:** 26-40%. **Grade III:** >41%. | | | | | |
