# Supplementary material for: Vertebral body height changes in acute symptomatic osteoporotic vertebral compression fractures treated with vertebral cement augmentation. Which factors affect vertebral body height?
Source: Research Square preprint supplement (doi:10.21203/rs.3.rs-430234/v1), 2021-04-21
Supplement: Supplementary file 3 [file de232d3b1f7d035cdf1896b4.docx]

| **Table 1.** Demographic characteristics. | |
| --- | --- |
| **Gender** |  |
| Male | 14 (29.2%) |
| Female | 34 (70.8%) |
| **Age,** SD | 70.9 ± 9.3 |
| **BMI** (kg/m2), SD | 26.5 ± 4 |
| **T-Score**, SD | -1.9 ± 1.1 |
| **Vertebral fracture age** |  |
| < 6 weeks | 49 (45.5%) |
| > 6 weeks | 59 (54.6%) |
| **Vertebral segment treated** |  |
| Thoracic (T1 - T10) | 42 (38.9%) |
| Thoracolumbar (T11 – L2) | 37 (34.3%) |
| Lumbar (L3 – L5) | 29 (26.8%) |
| **Type of fracture*** |  |
| Wedge | 33 (30,6%) |
| Biconcave | 75 (69.4%) |
| **Severity of fracture*** |  |
| Grade I | 39 (36.1%) |
| Grade II | 29 (26.9%) |
| Grade III | 40 (37%) |
| **IVVC** |  |
| No | 85 (78.7%) |
| Yes | 23 (21.3%) |
| **Volume of cement injected** | 3.5 ± 1.18 |
| BMI: Body Mass Index  SD: Standard Deviation  IVVC: Intervertebral vacuum cleft  *According Genant classification17 | |
